# Supplementary material for: The efficacy and toxicity of TRT on metastatic NSCLC in patients treated with targeted therapy and chemoimmunotherapy
Source: Research Square preprint supplement (doi:10.21203/rs.3.rs-8470834/v1), 2026-01-29
Supplement: Supplementary file 1 [file fff3a56196eeb5ca983f6694.docx]

Supplementary Table

| Variables | Total (n = 290) | No Radiotherapy (n = 86) | Radiotherapy (n = 204) |
| --- | --- | --- | --- |
|
| Firstline TKI, n(%) |  |  |  |
| Afatinib | 25 (8.62) | 11 (12.79) | 14 (6.86) |
| Alectinib | 8 (2.76) | 2 (2.33) | 6 (2.94) |
| Almonertinib | 93 (32.07) | 11 (12.79) | 82 (40.20) |
| Crizotinib | 7 (2.41) | 2 (2.33) | 5 (2.45) |
| Furmonertinib | 23 (7.93) | 7 (8.14) | 16 (7.84) |
| Gefitinib | 29 (10.00) | 14 (16.28) | 15 (7.35) |
| Osimertinib | 77 (26.55) | 26 (30.23) | 51 (25.00) |
| Other TKIs | 28 (9.66) | 13 (15.12) | 15 (7.35) |
| Firstline ICI, n(%) |  |  |  |
| Camrelizumab | 56 (24.03) | 23 (29.49) | 33 (21.29) |
| Pembrolizumab | 25 (10.73) | 8 (10.26) | 17 (10.97) |
| Sintilimab | 75 (32.19) | 18 (23.08) | 57 (36.77) |
| Tislelizumab | 62 (26.61) | 22 (28.21) | 40 (25.81) |
| Other ICIs | 15 (6.44) | 7 (8.97) | 8 (5.16) |
